# Supplementary material for: Altered brain morphology after focal radiation reveals impact of off-target effects: implications for white matter development and neurogenesis
Source: PubMed Central journal article supplement — Neuro Oncol. 2017 Nov 2;20(6):788–98. doi: 10.1093/neuonc/nox211 (PMC5961122; doi:10.1093/neuonc/nox211), 2017-11-02
Supplement: nox211_suppl_supplementary_materials.pdf [file nox211_suppl_supplementary_materials.pdf]

## Supplementary Figures

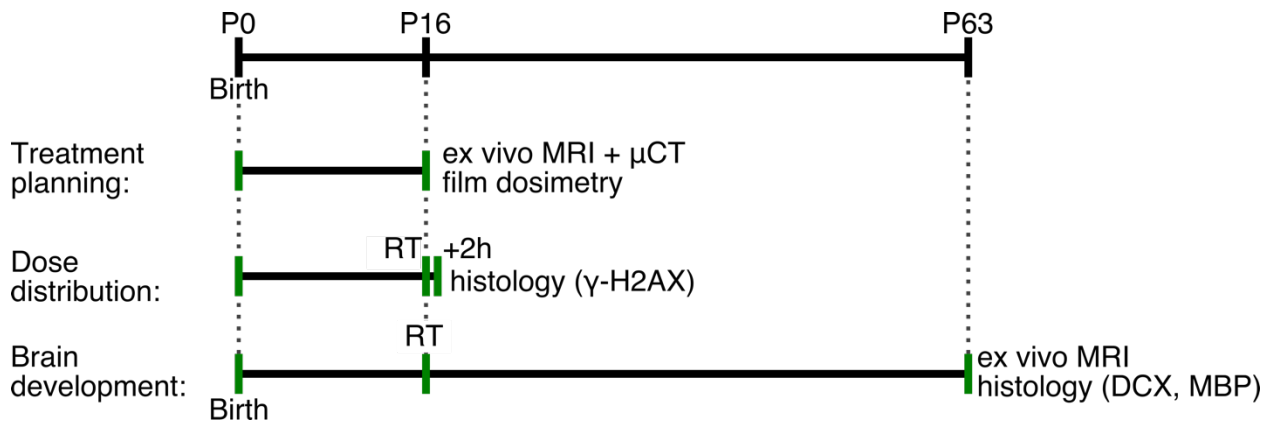

Supplementary Figure 1. The experimental timelines for each aspect of the study. MR and  $\mu$ CT images were used to generate a P16 atlas for radiation treatment planning. Film dosimetry in P16 brain specimens was used to confirm delivered dose. Whole-brain or focal irradiations (RT) occurred at P16, with  $\gamma$ -H2AX histology used to assess the spatial distribution of delivered radiation dose (using a separate group of mice 2h after RT). To assess impact of RT on brain development, ex-vivo MR images were acquired at P63, and volumetric differences computed using an automated imaging processing pipeline. In the same samples, DCX and MBP staining was used to assess neurogenesis and myelination, respectively.

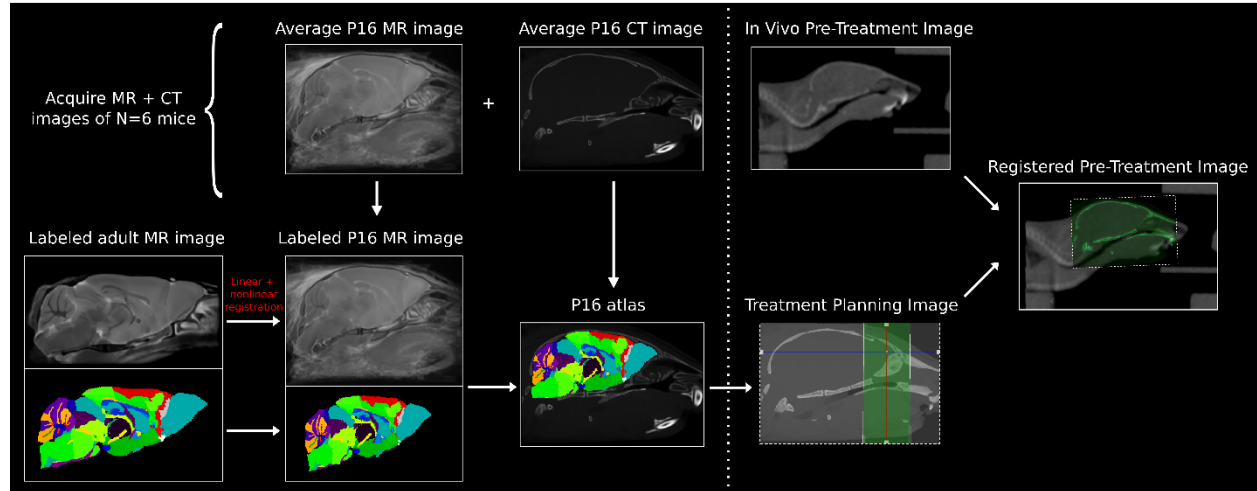

Supplementary Figure 2. The generation of a segmented P16  $\mu$ -CT atlas for planning, with registration of in vivo CT images prior to dose delivery. An ex vivo MR volume of a P63 mouse with segmented brain structures was registered linearly and nonlinearly to an average P16 ex vivo MR volume to obtain a P16 brain atlas. The P16 MR volume was then rigidly registered to the average P16  $\mu$ -CT image obtained from the same specimens to produce a P16 atlas for radiation treatment planning. This P16 atlas was used to determine the ROI coordinates for all irradiation cohorts. During each irradiation procedure, the in vivo pre-treatment image is registered to the P16 atlas and the stage position is adjusted to produce the desired treatment position.

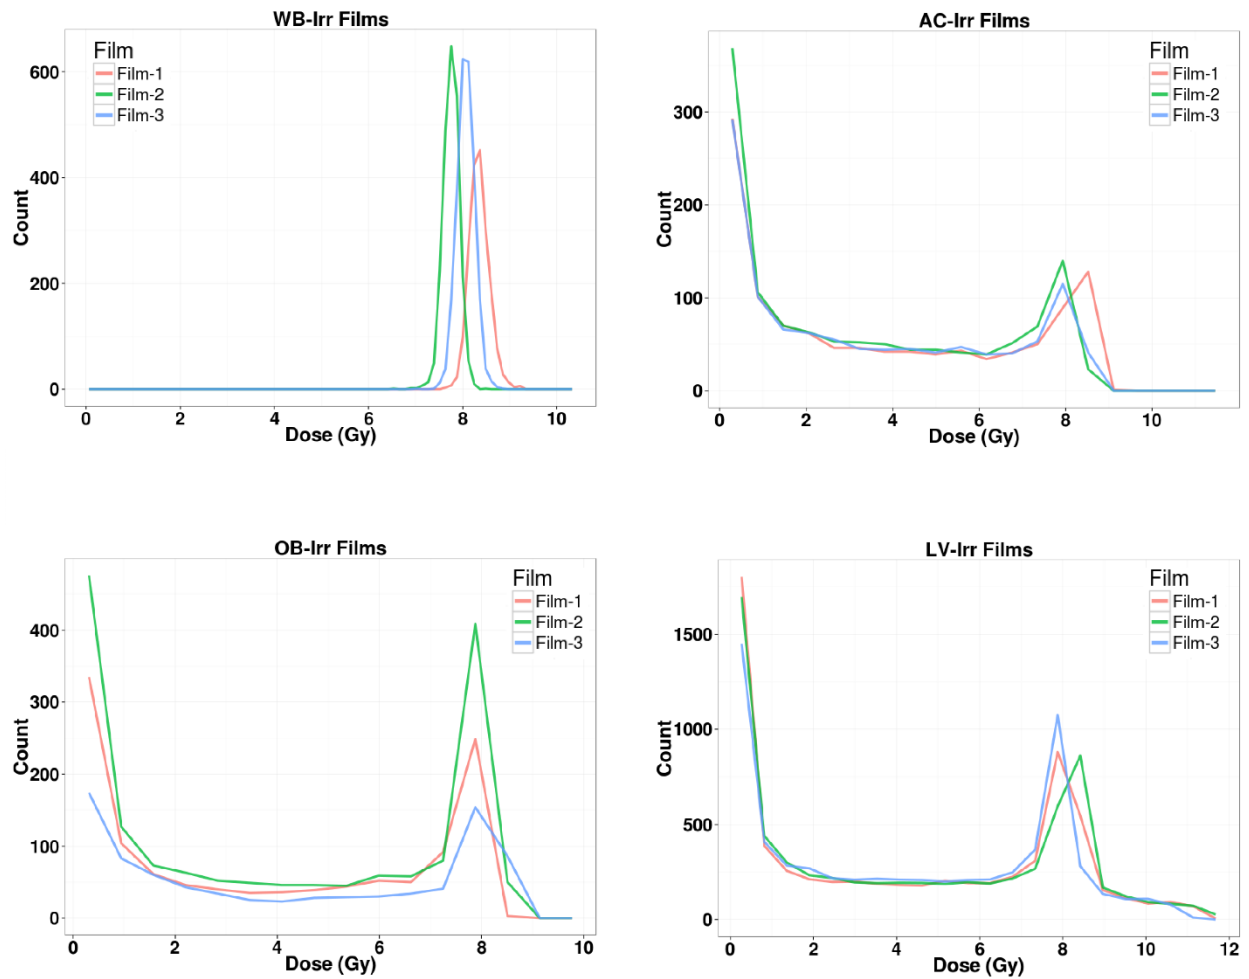

Supplementary Figure 3. Dose histograms illustrating delivered dose for each ROI as determined with radiochromic film dosimetry. EBT3 films placed within the brain and skull of ex vivo P16 specimens were treated identically to in anesthetized mice in vivo. Dose counts obtained from optical density measurements are shown as histograms (with  $n=3$  films per irradiation ROI). The delivered dose was within  $\pm 5\%$  error of the 8Gy target. Lower end tails in the AC-Irr, OB-Irr and LV-Irr films represent scattered dose. Higher end tails in the LV-Irr films represent regions of beam overlap due to multiple targets.

A

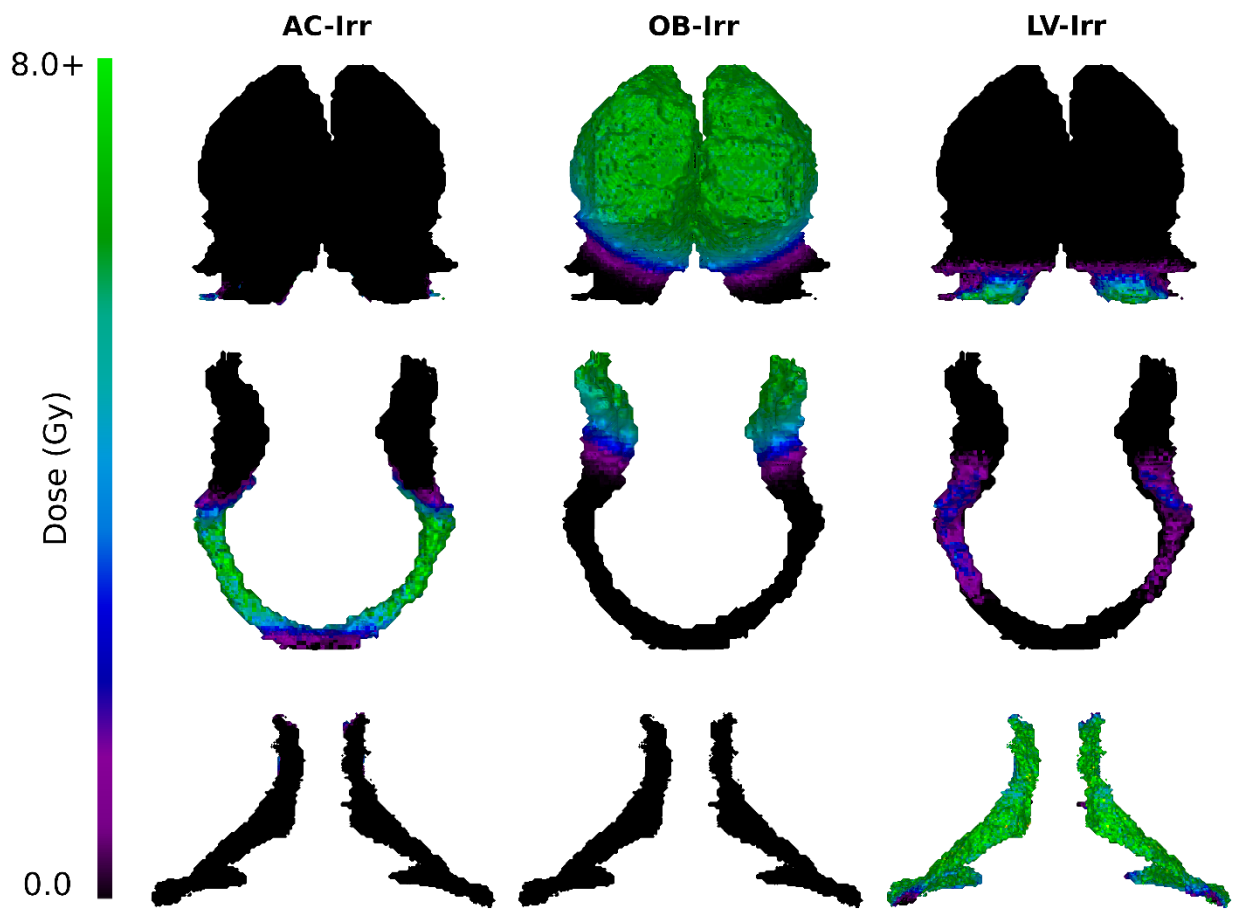

B

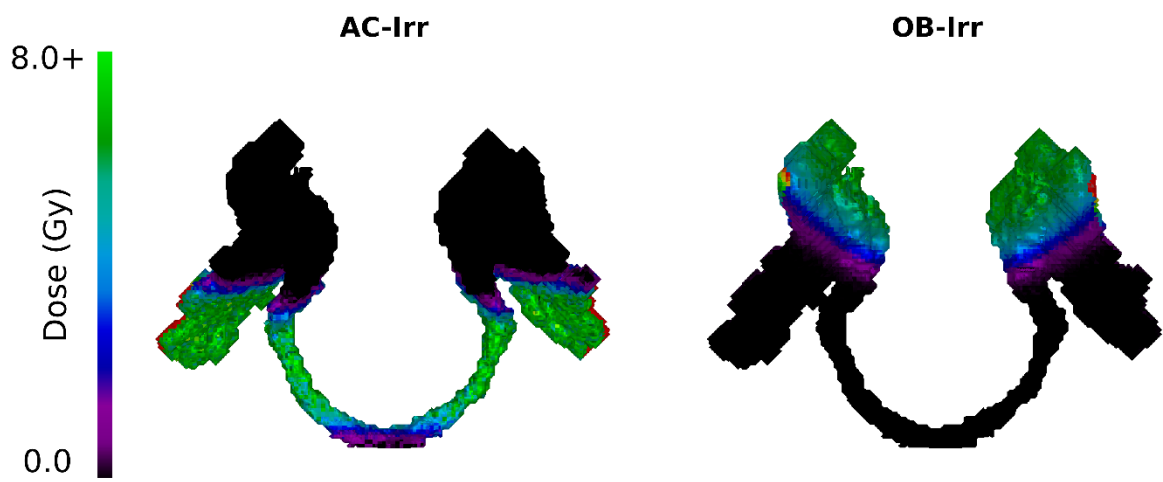

Supplementary Figure 4. Horizontal views of surface renderings show simulated radiation dose distributions on targeted and untargeted brain structures. In (A), the AC-Irr, OB-Irr and LV-Irr groups are shown in columns. The delivered dose is rendered on the surfaces of the OB (top), AC (middle) and LV (bottom). In (B), the AC and LOT volumes are rendered together. The ROI sizes are not shown using a common scale.

Structure

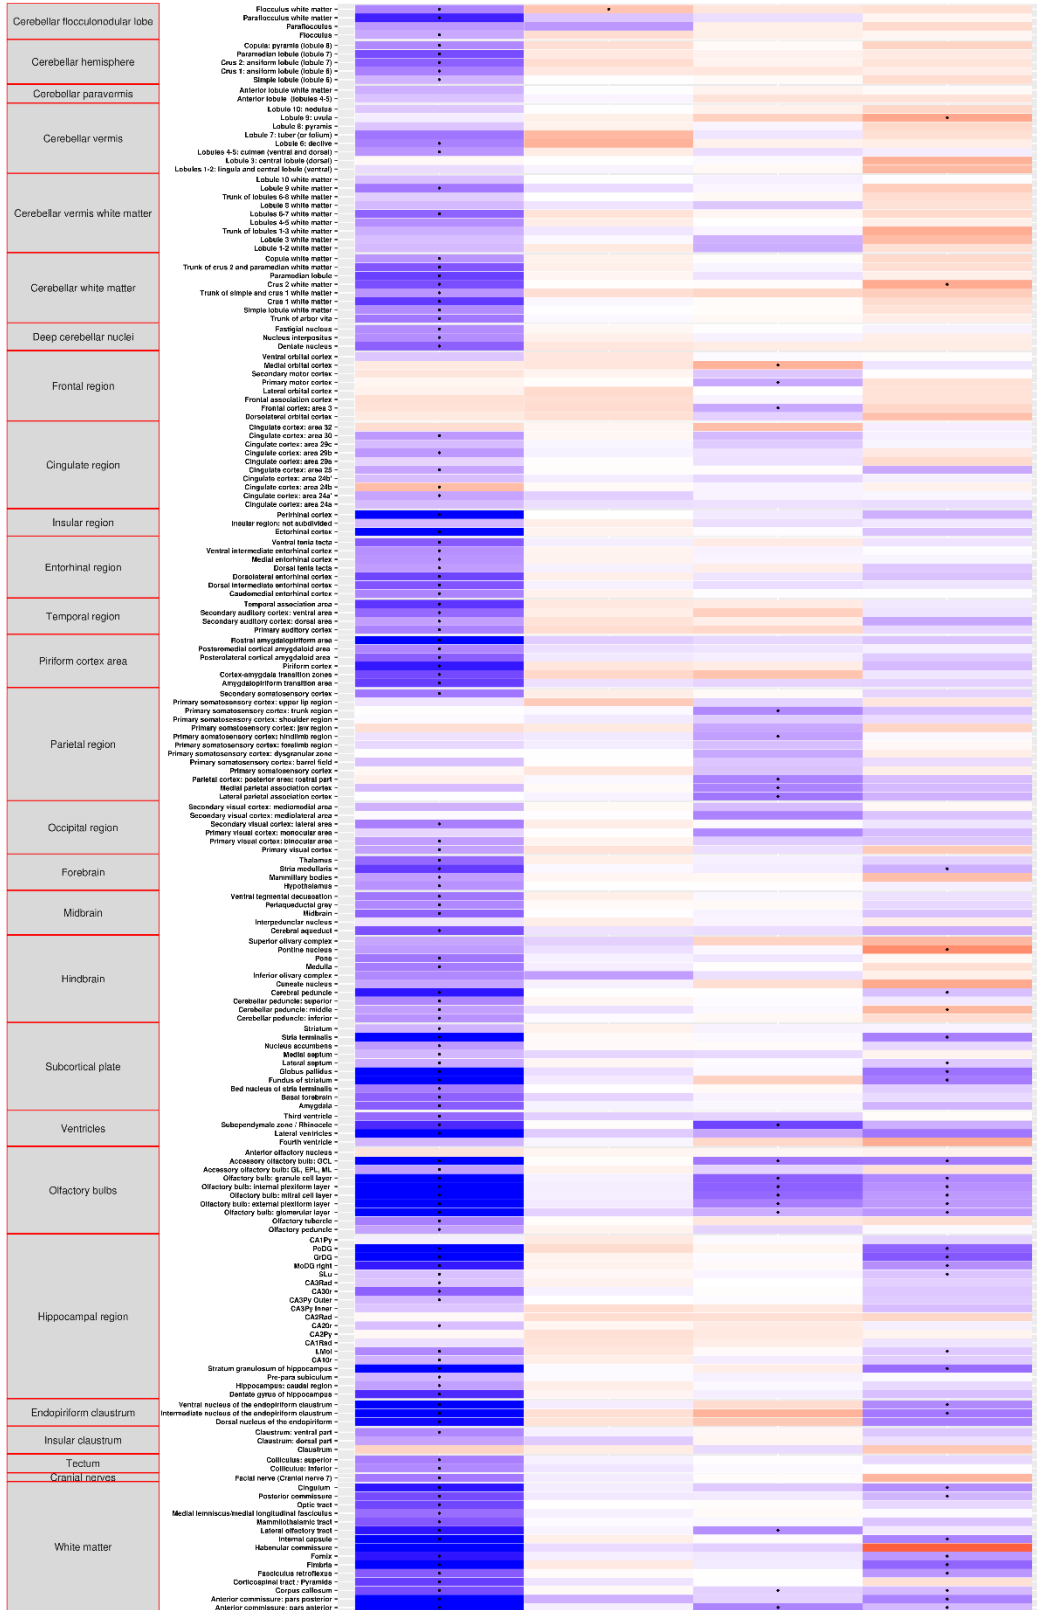

Normalized Volume  
 1.10  
 1.05  
 1.00  
 0.95  
 0.90  
 0.85

WB-Irr AC-Irr OB-Irr LV-Irr  
 Irradiation Cohort

Supplementary Figure 5. Heatmap indicating brain-wide changes in volume for all atlas structures. Values are shown relative to control volumes for each structure (i.e., indicating fold-change). Structures are grouped into regions as shown at left. A dot (•) indicates statistical significance at  $q < 0.05$  compared to controls.

## Supplementary Materials and Methods

### *Mice*

C57Bl/6J breeding pairs (The Jackson Laboratory) were housed and bred in the University Health Network Animal Resource Centre to obtain male and female offspring for all irradiation procedures and associated experiments. The day of litter birth was designated post-natal day zero (P0). Mice were maintained in a 12h light-dark cycle with access to food and water ad libitum. C57Bl/6J mice breeding pairs from the Centre for Phenogenomics in-house colony were used to generate mice for the P16 atlas and film dosimetry experiments.

### *Treatment planning*

To generate a representative P16 image for Hounsfield Unit (HU)-based radiation treatment planning, six fixed P16 mouse heads were imaged ex vivo with  $\mu$ -CT at a spatial resolution of 10  $\mu$ m with a 40 kV / 250 mA beam specification (10 mW) using a Bruker SkyScan 1172 system (Bruker  $\mu$ -CT, Belgium). Image HU values were calibrated to mouse bone densities obtained from two mouse bone phantoms (Bruker, Belgium). In order to map brain anatomy within the P16  $\mu$ -CT volume, ex vivo MRI was performed on the same samples. Average MR and CT images representative of the six P16 mouse brains were generated independently by registration. A segmented neuroanatomical MRI atlas was linearly and nonlinearly registered to the average P16 MR image, which was in turn affine registered to the average  $\mu$ -CT image (Supplementary Figure 2). The segmented atlas was then mapped to the average  $\mu$ -CT image and provided the basis for treatment planning.

Beam geometries were established based on the use of circular collimators for each ROI. Parallel-opposed beam pairs 180° apart were used in all cases with the aim of achieving a



homogeneous 8 Gy dose distribution in the ROI. WB-Irr, AC-Irr and OB-Irr plans used collimators oriented in the dorsoventral, mediolateral and dorsoventral directions, respectively. The LV-Irr plan employed three parallel-opposed beam pair targets in the mediolateral direction (with a small degree of overlap at the lateral edges of the beams).

Radiochromic film dosimetry was performed in order to quantify the dose deposited for each ROI (Supplementary Figure 3).

### *Histology*

For  $\gamma$ -H2AX staining (STTARR Innovation Centre, Toronto), mice were intraperitoneally anaesthetized using ketamine (150 mg/kg) and xylazine (10 mg/kg) and transcardially perfused. Brains were dissected and paraffinized into blocks, dewaxed in xylene, and rehydrated using alcohols. Antigen retrieval was performed in a sodium citrate buffer of pH 6.0 for 8 min. Autofluorescence was reduced with a 0.1% Sudan Black B solution for 8 min. Non-specific antibody binding was blocked using 5% normal goat serum for 30 min at room temperature. Sections were incubated for 1h at room temperature with rabbit anti- $\gamma$ -H2AX primary antibody (1:1500; Bethyl Laboratories Inc.), and then with goat anti-rabbit Alexafluor 555 (1:200) secondary antibody for 1h at room temperature. All antibodies were diluted using Dako antibody diluent. Sections were washed, incubated in a working solution of 4', 6-diamidino-2-phenylindole (DAPI) for 5 min, rinsed with dH<sub>2</sub>O, and coverslipped with Vectamount hardset mounting media. Stained images were captured on a scanning laser confocal microscope (TISSUEScope 4000, Huron Technologies).

For histological analyses of myelination and neurogenesis at P63, mouse brains were dissected and cryoprotected in a 30% sucrose solution and frozen at -20°C. Coronal sections cut

at 40- $\mu\text{m}$  thickness were collected in tissue cryoprotectant solution in 96-well plates, and stored at  $-20^{\circ}\text{C}$ . Sections containing LVs and the hippocampus between 1.1 mm and -3.1 mm relative to the bregma were used for doublecortin (DCX), and myelin basic protein (MBP) immunohistochemistry. Primary antibodies included rabbit anti-DCX (1:1000, Abcam), and rat anti-MBP (1:200, Millipore). Secondary antibodies conjugated to Cy2 (1:200, Jackson ImmunoResearch) and Cy3 (1:200; Jackson ImmunoResearch) were used to reveal the immunoreactivity. Sections were counterstained with DAPI.

#### *Cell Counting and MBP Staining Intensity Analysis*

DCX positive (+) cells were counted within the dentate gyrus (DG) including a 50- $\mu\text{m}$  hilar margin of the subgranular zone (SGZ), another neurogenic niche located within the hippocampus, using a Zeiss Imager M1 microscope with the Stereo Investigator software (MicroBrightField, Williston, VT, USA). A counting frame and sampling grid of 75  $\mu\text{m} \times 75 \mu\text{m}$  were used with a magnification of 63X, sampled every seventh section. The coefficient of error was between 0.03 and 0.06 in all stereological studies. For the SVZ, AC, and CC, a non-stereologic method was used, counting DCX<sup>+</sup> cells in the left and right SVZ within at least  $2.13 \times 10^7 \mu\text{m}^3$  of SVZ in three sections at seven section intervals per mouse.
